# Supplementary material for: Influence of short- and long-term exposure on the biodegradation capacity of activated sludge microbial communities in ready biodegradability tests
Source: Royal Society of Chemistry journal article supplement (doi:10.1039/d0ew00776e), 2020-11-14
Supplement: d0ew00776e1.pdf [file d0ew00776e1.pdf]

## 1 *1 Supplementary materials*

2

### 3 *1.1 Appendix A*

Table S1: General information about each sampled wastewater treatment plant

|                   | Type                          | Biological capacity<br>Population equivalents (P.E.) à g<br>TOD/day | Hydraulic capacity<br>(m <sup>3</sup> /hour) |
|-------------------|-------------------------------|---------------------------------------------------------------------|----------------------------------------------|
| <b>Amsterdam</b>  | Aeration tank                 | 1.014.000 à 136                                                     | 30 000                                       |
| <b>Amstelveen</b> | Aeration tank                 | 125.000 à 136                                                       | 4 500                                        |
| <b>Utrecht</b>    | Aeration tank                 | 530.000 à 136                                                       | 15 000                                       |
| <b>Bennekom</b>   | Oxidation ditch/<br>carrousel | 22.000 à 136                                                        | 1000                                         |
| <b>Eindhoven</b>  | Activated sludge              | 750.000 à 136                                                       | 35 000                                       |

Table S2: Reported measured concentration of CBZ and MET in influent and effluent of the WWTP sampled in this project. Data were collected from emissieregistratie.nl

|            | WWTP | year | Concentration (µg/l) |       |       |          |       |       | Load (mg/year/P.E) |       |       |          |       |       |
|------------|------|------|----------------------|-------|-------|----------|-------|-------|--------------------|-------|-------|----------|-------|-------|
|            |      |      | Influent             |       |       | Effluent |       |       | Influent           |       |       | Effluent |       |       |
|            |      |      | Min                  | Mean  | Max   | Min      | Mean  | Max   | Min                | Mean  | Max   | Min      | Mean  | Max   |
| <b>CBZ</b> | BNK  | 2009 | 0.6                  | 0.615 | 0.63  | 0.71     | 0.755 | 0.8   | 29.33              | 30.94 | 32.54 | 36.68    | 37.89 | 39.11 |
|            |      | 2007 |                      |       |       | 0.5      | 0.5   | 0.5   |                    |       |       | 64.9     | 64.9  | 64.9  |
|            | UTR  | 2010 | 0.49                 | 0.56  | 0.63  | 0.38     | 0.57  | 0.76  | 33.66              | 35.61 | 37.57 | 26.11    | 35.71 | 45.32 |
|            | EIN  | 2007 |                      |       |       | 0.54     | 0.54  | 0.54  |                    |       |       | 28.17    | 28.17 | 28.17 |
|            |      | 2009 | 0.52                 | 0.545 | 0.57  | 0.46     | 0.545 | 0.63  | 28.79              | 30.32 | 31.84 | 23.23    | 30.91 | 38.58 |
|            |      | 2014 |                      |       |       | 0.44     | 0.44  | 0.44  |                    |       |       | 37.98    | 37.98 | 37.98 |
|            | AMV  | 2010 |                      |       |       | 1.549    | 1.549 | 1.549 |                    |       |       | 158.6    | 158.6 | 158.6 |
| AMS        |      |      |                      |       |       |          |       |       |                    |       |       |          |       |       |
| <b>MET</b> | BNK  | 2009 | 0                    | 0     | 0     | 0        | 0     | 0     | 0                  | 0     | 0     | 0        | 0     | 0     |
|            | UTR  | 2010 | 302.2                | 326.4 | 350.6 | 4.8      | 4.85  | 4.9   | 20760              | 20830 | 20910 | 292.2    | 311   | 329.8 |
|            | EIN  | 2009 | 77.8                 | 81.4  | 85    | 1.1      | 1.3   | 1.5   | 4293               | 4529  | 4764  | 67.36    | 71.56 | 75.76 |
|            |      | 2014 |                      |       |       | 1.8      | 4.2   | 6.6   |                    |       |       | 155.4    | 362.5 | 569.7 |
|            | AMS  |      |                      |       |       |          |       |       |                    |       |       |          |       |       |
|            | AMV  |      |                      |       |       |          |       |       |                    |       |       |          |       |       |

4

5 **1.2 Appendix B**

6

Table S3: MiSeq sequencing primers with pad-linker as selected based on (34)

|               |                                   |
|---------------|-----------------------------------|
| V4P7_index    | ATTAGAWACCCBDGTAGTCCGGCTGACTGACT  |
| V4F_seqprim R | AGTCAGTCAG-CC-GGACTACHVGGGTWCTAAT |
| V3F_seqprim F | TATGGTAATT-GG-CCTACGGGNGGCWGCAG   |

7

8 1.3 Appendix C

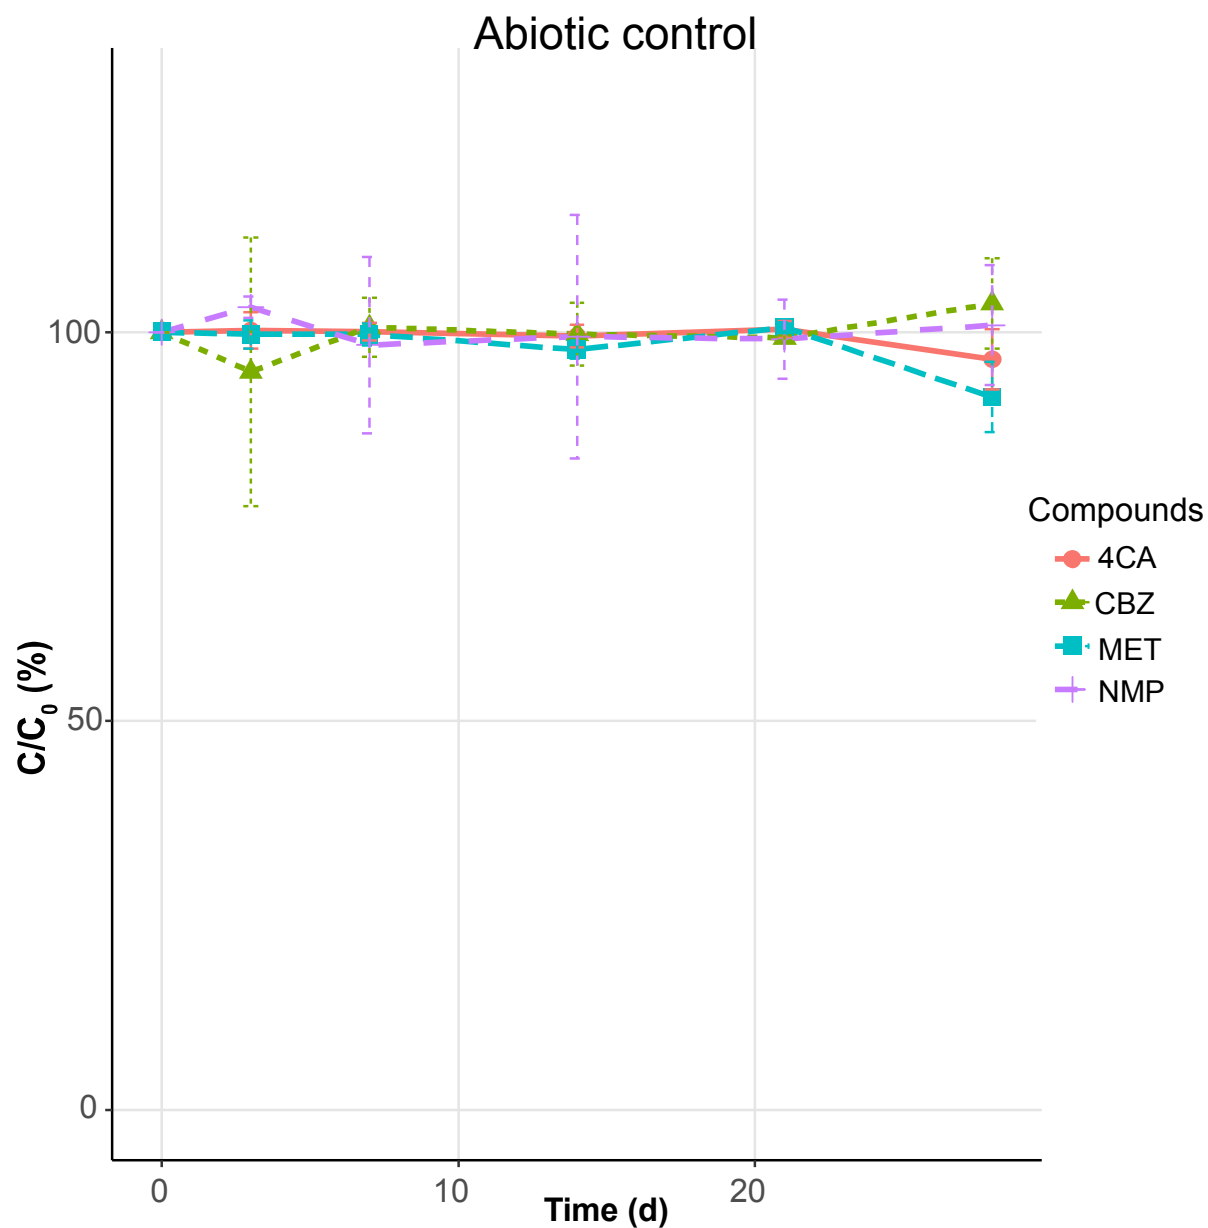

Fig. S1:  $C/C_0$  (%) of 4-chloroaniline (4CA), carbamazepine (CBZ), metformin (MET) and N-methylpiperazine (NMP) in the abiotic controls.

10 **1.4 Appendix D**

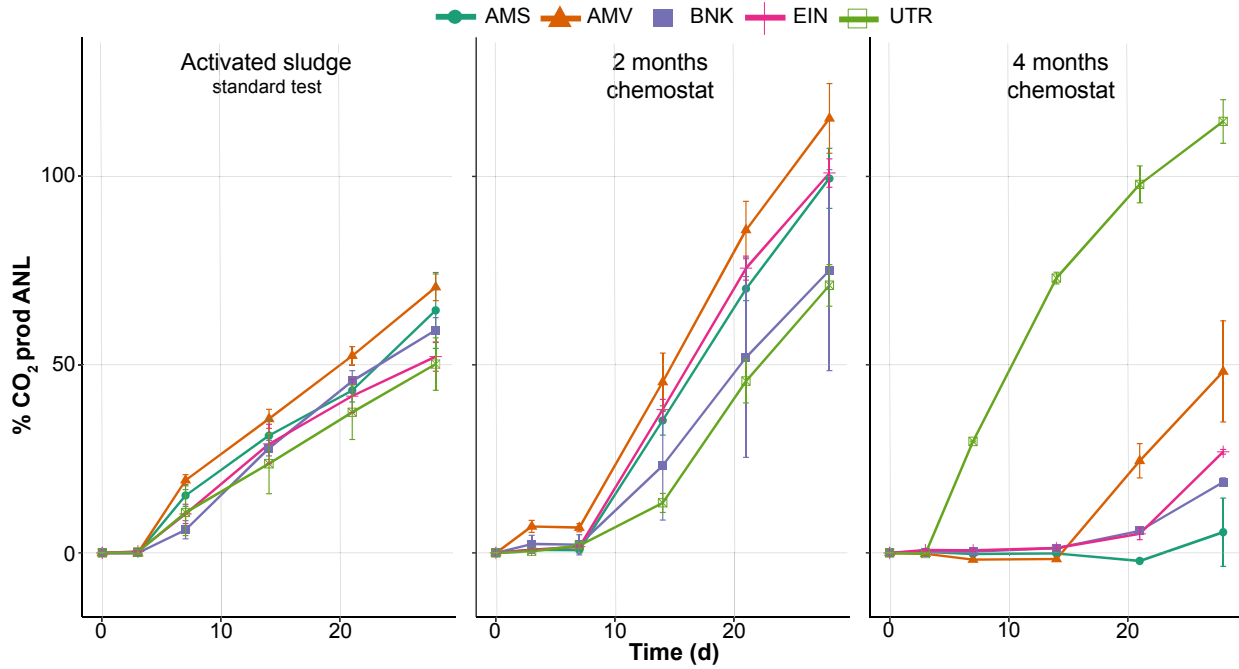

Fig. S2: % of CO<sub>2</sub> production from ANL by activated sludge (autumn) (A) and chemostat-exposed communities in biodegradability tests.

11

12

13 **1.5 Appendix E**

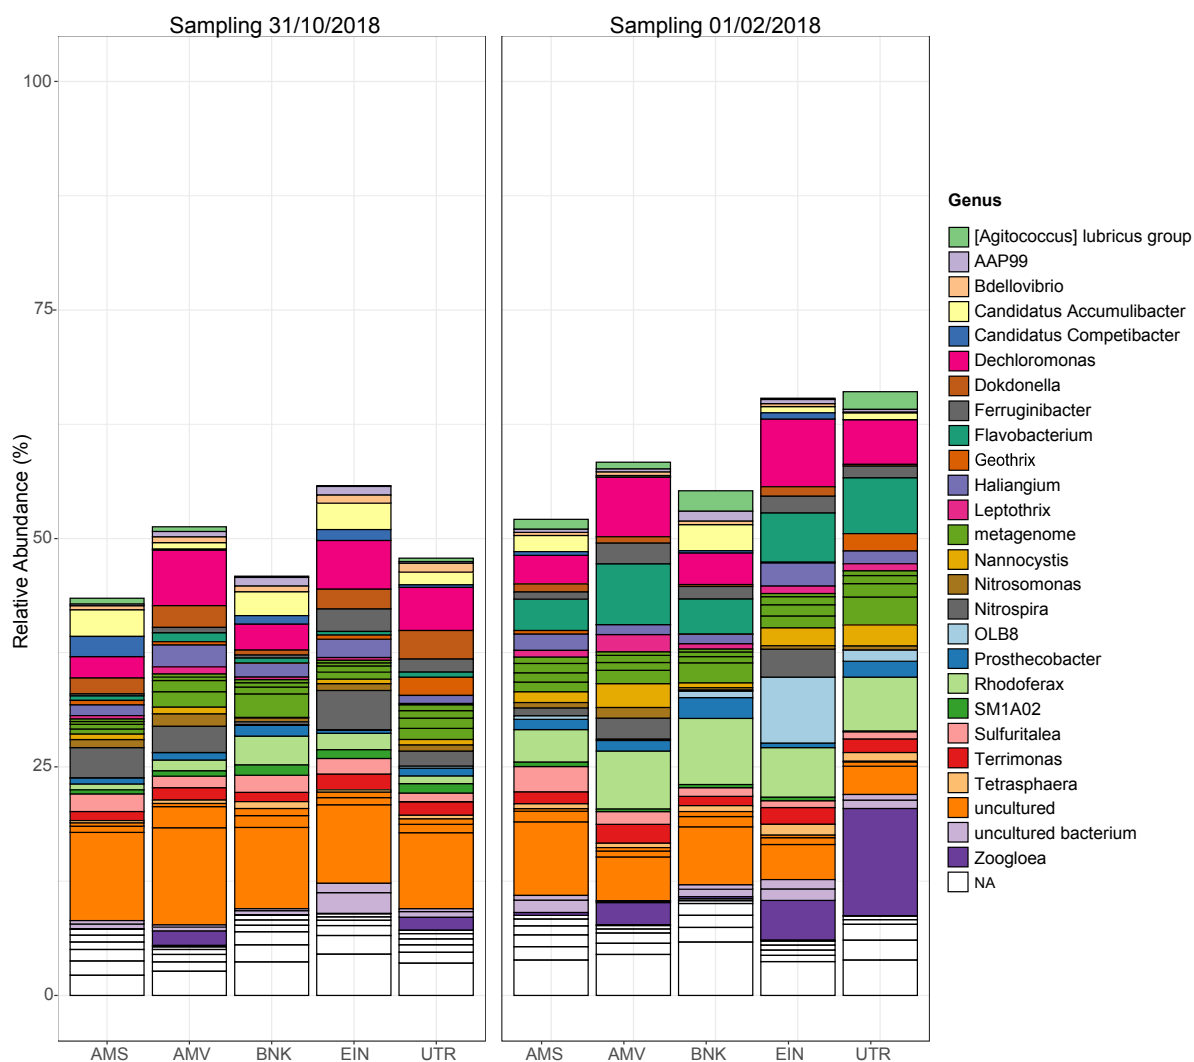

Fig. S3: Genus and relative abundance (%) of the dominant taxa (>0.5%) in the different activated sludges sampled in autumn (31/10/2018) and winter (01/02/2018). Amsterdam (AMS), Amstelveen (AMV), Bennekom (BNK), Eindhoven (EIN), Utrecht (UTR). NA means that no genus could be assigned.

14

15

16 **1.6 Appendix F**

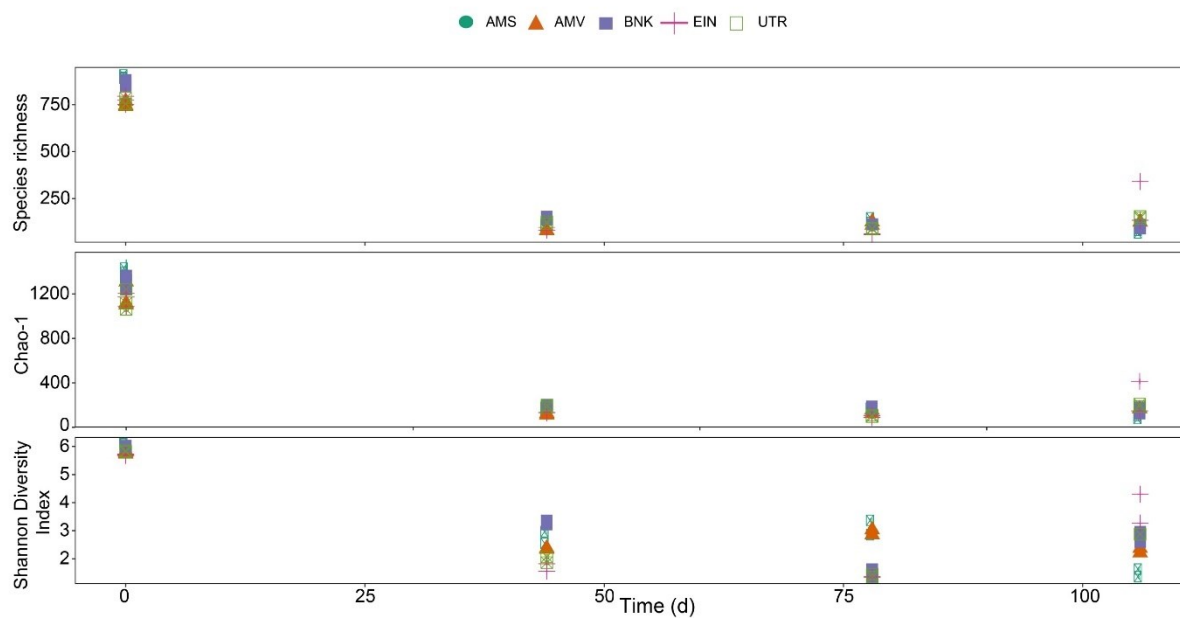

Fig. S4: Alpha diversity analysis of each chemostat sample over time (d). Species richness (number of OTUs/sample). Each colour represents a chemostat inoculated with activated sludge from each location: Amsterdam (AMS), Amstelveen (AMV), Bennekom (BNK), Eindhoven (EIN), Utrecht (UTR).

17

18

19
